# Supplementary material for: Body Fat-Reducing Effects of Whey Protein Diet in Male Mice
Source: MDPI journal article supplement (doi:10.3390/nu15102263), 2023-05-10
Supplement: s1 [file s1]

Supplementary Table S3. Results of comparative analysis

|        |                               |             |                                        | Concentration (nmol/g) |       |       |       |       |         |         |         |         |         |           |      |         |       | Comparative Analysis       |                      |
|--------|-------------------------------|-------------|----------------------------------------|------------------------|-------|-------|-------|-------|---------|---------|---------|---------|---------|-----------|------|---------|-------|----------------------------|----------------------|
| ID     | Metabolite                    | PubChem CID | HMDB ID                                | treatment              |       |       |       |       | Control |         |         |         |         | treatment |      | Control |       | treatment<br>vs<br>Control |                      |
|        |                               |             |                                        | whye2                  | whye3 | whye4 | whye5 | whye6 | casein2 | casein3 | casein4 | casein5 | casein6 | Mean      | S.D. | Mean    | S.D.  | Ratio <sup>†</sup>         | p-value <sup>‡</sup> |
| A_0009 | 2-Hydroxybutyric acid         | 440864      | HMDB00000008                           | 0.6                    | N.D.  | 1.8   | 1.1   | N.D.  | 1.2     | 2.8     | N.D.    | 2.1     | 1.6     | 1.2       | 0.6  | 1.9     | 0.7   | 0.6                        | 0.2                  |
| A_0035 | 2-Oxoglutaric acid            | 51          | HMDB00000208                           | N.D.                   | N.D.  | 4.5   | N.D.  | N.D.  | N.D.    | N.D.    | N.D.    | N.D.    | N.D.    | 4.5       | N.A. | N.A.    | N.A.  | 1<                         | N.A.                 |
| A_0013 | 2-Oxoisovaleric acid          | 49          | HMDB00000019                           | N.D.                   | N.D.  | N.D.  | N.D.  | N.D.  | N.D.    | N.D.    | N.D.    | N.D.    | N.D.    | N.A.      | N.A. | N.A.    | N.A.  | N.A.                       | N.A.                 |
| A_0070 | 2-Phosphoglyceric acid        | 439278      | HMDB00000391                           | 4.2                    | N.D.  | 2.5   | 2.6   | 1.0   | N.D.    | 2.6     | 1.9     | 0.8     | N.D.    | 2.6       | 1.3  | 1.8     | 0.9   | 1.5                        | 0.4                  |
| A_0008 | 3-Hydroxybutyric acid         | 441         | HMDB00000111 HMDB00000357 HMDB00000442 | 37                     | 15    | 51    | 31    | 26    | 23      | 49      | 44      | 95      | 12      | 32        | 14   | 44      | 32    | 0.7                        | 0.5                  |
| A_0071 | 3-Phosphoglyceric acid        | 439183      | HMDB00000807                           | 29                     | 4.5   | 17    | 16    | 6.0   | 14      | 16      | 13      | 5.4     | 7.5     | 14        | 9.8  | 11      | 4.5   | 1.3                        | 0.5                  |
| A_0112 | 6-Phosphogluconic acid        | 91493       | HMDB0001316                            | 8.7                    | 1.5   | 4.1   | 2.4   | 1.3   | N.D.    | N.D.    | 0.4     | 1.4     | 2.6     | 3.6       | 3.1  | 1.5     | 1.1   | 2.4                        | 0.2                  |
| A_0144 | Acetyl CoA, _divalent         | 444493      |                                        | N.D.                   | N.D.  | 0.2   | N.D.  | N.D.  | N.D.    | N.D.    | N.D.    | N.D.    | N.D.    | 0.2       | N.A. | N.A.    | N.A.  | 1<                         | N.A.                 |
| C_0068 | Adenine                       | 190         | HMDB00000034                           | 0.3                    | 0.08  | 0.7   | 0.2   | 0.2   | 0.06    | 0.10    | 0.09    | 0.07    | 0.08    | 0.3       | 0.2  | 0.08    | 0.02  | 4.1                        | 0.1                  |
| C_0187 | Adenosine                     | 60961       | HMDB00000050                           | 6.4                    | 0.5   | 109   | 3.4   | 3.5   | 1.3     | 2.2     | 2.0     | 1.2     | 0.7     | 25        | 47   | 1.5     | 0.6   | 16.6                       | 0.3                  |
| A_0148 | ADP                           | 6022        | HMDB0001341                            | 12                     | 2.1   | 152   | 5.9   | 3.8   | 4.9     | 5.4     | 3.1     | 3.6     | 2.8     | 35        | 66   | 3.9     | 1.1   | 9.0                        | 0.3                  |
| C_0011 | Ala                           | 602         | HMDB0000161 HMDB00001310               | 110                    | 75    | 133   | 98    | 81    | 89      | 110     | 92      | 87      | 120     | 99        | 23   | 99      | 14    | 1.0                        | 1.0                  |
| A_0130 | AMP                           | 6083        | HMDB00000045                           | 32                     | 26    | 170   | 34    | 67    | 70      | 110     | 74      | 62      | 47      | 66        | 60   | 73      | 23    | 0.9                        | 0.8                  |
| C_0071 | Anthrnic acid                 | 227         | HMDB0001123                            | N.D.                   | N.D.  | N.D.  | N.D.  | N.D.  | N.D.    | N.D.    | N.D.    | N.D.    | N.D.    | N.A.      | N.A. | N.A.    | N.A.  | N.A.                       | N.A.                 |
| C_0119 | Arg                           | 6322        | HMDB0000517 HMDB00003416               | 23                     | 6.1   | 34    | 9.6   | 15    | 12      | 13      | 11      | 13      | 13      | 17        | 11   | 13      | 0.9   | 1.4                        | 0.4                  |
| C_0063 | Asn                           | 236         | HMDB0000168 HMDB00033780               | 16                     | 5.9   | 25    | 10    | 9.2   | 8.4     | 11      | 9.6     | 9.7     | 10      | 13        | 7.3  | 9.7     | 0.8   | 1.4                        | 0.3                  |
| C_0067 | Asp                           | 424         | HMDB0000191 HMDB00006483               | 44                     | 26    | 61    | 31    | 24    | 27      | 55      | 32      | 44      | 35      | 37        | 16   | 39      | 11    | 1.0                        | 0.9                  |
| A_0159 | ATP                           | 5957        | HMDB00000538                           | 6.6                    | 0.3   | 188   | 1.5   | 0.5   | 0.7     | 0.8     | 0.3     | 0.4     | 0.2     | 39        | 83   | 0.5     | 0.2   | 82.2                       | 0.4                  |
| C_0036 | Betaine                       | 247         | HMDB00000043                           | 48                     | 9.6   | 117   | 21    | 9.9   | 13      | 12      | 10      | 7.9     | 12      | 41        | 45   | 11      | 2.0   | 3.7                        | 0.2                  |
| C_0040 | Betaine aldehyde, +H2O        | 249         |                                        | 2.0                    | 0.4   | 1.2   | 1.5   | 0.7   | 0.8     | 0.2     | 0.4     | 0.5     | 1.5     | 1.2       | 0.6  | 0.7     | 0.5   | 1.7                        | 0.2                  |
| A_0127 | cAMP                          | 6076        | HMDB00000058                           | N.D.                   | N.D.  | 1.0   | N.D.  | N.D.  | N.D.    | N.D.    | N.D.    | N.D.    | N.D.    | 1.0       | N.A. | N.A.    | N.A.  | 1<                         | N.A.                 |
| C_0158 | Carnosine                     | 439224      | HMDB00000033                           | 2.9                    | 0.3   | 28    | 0.6   | 0.2   | 0.5     | 0.3     | 0.3     | 0.05    | 0.3     | 6.4       | 12   | 0.3     | 0.2   | 21.6                       | 0.3                  |
| A_0142 | CDP                           | 6132        | HMDB00001546                           | N.D.                   | N.D.  | 0.9   | N.D.  | N.D.  | N.D.    | N.D.    | 0.3     | N.D.    | N.D.    | 0.9       | N.A. | N.A.    | N.A.  | 1<                         | N.A.                 |
| A_0129 | cGMP                          | 24316       | HMDB0001314                            | N.D.                   | N.D.  | N.D.  | N.D.  | N.D.  | N.D.    | N.D.    | N.D.    | N.D.    | N.D.    | N.A.      | N.A. | N.A.    | N.A.  | N.A.                       | N.A.                 |
| C_0024 | Choline                       | 305         | HMDB00000097                           | 123                    | 27    | 196   | 63    | 55    | 45      | 42      | 30      | 40      | 38      | 93        | 67   | 39      | 5.5   | 2.4                        | 0.1                  |
| A_0062 | cis-Aconitic acid             | 643757      | HMDB00000072                           | 2.1                    | 0.8   | 4.3   | 1.2   | 0.7   | 1.7     | 1.6     | 1.7     | 1.7     | 1.3     | 1.8       | 1.5  | 1.6     | 0.2   | 1.2                        | 0.7                  |
| A_0081 | Citric acid                   | 311         | HMDB00000094                           | 48                     | 24    | 113   | 38    | 19    | 34      | 37      | 30      | 35      | 24      | 48        | 38   | 32      | 5.2   | 1.5                        | 0.4                  |
| C_0121 | Citrulline                    | 9750        | HMDB00000004                           | 8.3                    | 4.8   | 17    | 8.7   | 6.7   | 9.4     | 8.7     | 6.9     | 6.8     | 6.7     | 9.1       | 4.8  | 7.7     | 1.3   | 1.2                        | 0.6                  |
| A_0124 | CMP                           | 6131        | HMDB00000095                           | 2.9                    | 2.5   | 9.8   | 4.5   | 3.3   | 4.6     | 5.5     | 3.9     | 4.5     | 4.5     | 4.6       | 3.0  | 4.6     | 0.6   | 1.0                        | 1.0                  |
| A_0138 | CoA, _divalent                | 87642       |                                        | 0.3                    | 1.7   | 0.3   | 0.5   | 0.4   | N.D.    | N.D.    | N.D.    | N.D.    | N.D.    | 0.6       | 0.6  | N.A.    | N.A.  | 1<                         | N.A.                 |
| C_0064 | Creatine                      | 586         | HMDB00000064                           | 262                    | 62    | 875   | 98    | 71    | 131     | 84      | 60      | 84      | 65      | 273       | 346  | 85      | 28    | 3.2                        | 0.3                  |
| C_0031 | Creatinine                    | 588         | HMDB000000562                          | 2.7                    | 0.8   | 5.1   | 1.1   | 1.0   | 1.9     | 2.0     | 2.6     | 4.1     | 0.9     | 2.1       | 1.8  | 2.3     | 1.2   | 0.9                        | 0.9                  |
| A_0155 | CTP                           | 6176        | HMDB00000082                           | N.D.                   | N.D.  | 1.6   | N.D.  | N.D.  | N.D.    | N.D.    | N.D.    | N.D.    | N.D.    | 1.6       | N.A. | N.A.    | N.A.  | 1<                         | N.A.                 |
| C_0043 | Cys                           | 594         | HMDB00000574 HMDB00003417              | 0.11                   | N.D.  | 0.09  | N.D.  | N.D.  | N.D.    | 0.09    | N.D.    | 0.07    | N.D.    | 0.10      | 0.02 | 0.08    | 0.011 | 1.2                        | 0.4                  |
| C_0169 | Cytidine                      | 6175        | HMDB00000089                           | 8.1                    | 1.9   | 7.1   | 3.9   | 2.2   | 3.0     | 2.0     | 1.4     | 2.0     | 2.0     | 4.6       | 2.9  | 2.1     | 0.5   | 2.2                        | 0.1                  |
| C_0028 | Cytosine                      | 597         | HMDB000000630                          | N.D.                   | N.D.  | N.D.  | N.D.  | N.D.  | N.D.    | N.D.    | N.D.    | N.D.    | N.D.    | N.A.      | N.A. | N.A.    | N.A.  | N.A.                       | N.A.                 |
| A_0158 | dATP                          | 15993       | HMDB0001532                            | N.D.                   | N.D.  | N.D.  | N.D.  | N.D.  | N.D.    | N.D.    | N.D.    | N.D.    | N.D.    | N.A.      | N.A. | N.A.    | N.A.  | N.A.                       | N.A.                 |
| A_0153 | dCTP                          | 65091       | HMDB00000098                           | N.D.                   | N.D.  | N.D.  | N.D.  | N.D.  | N.D.    | N.D.    | N.D.    | N.D.    | N.D.    | N.A.      | N.A. | N.A.    | N.A.  | N.A.                       | N.A.                 |
| A_0056 | Dihydroxyacetone phosphate    | 668         | HMDB0001473                            | 13                     | 1.9   | 25    | 4.6   | 2.0   | 2.4     | 1.4     | 1.2     | 3.6     | 4.0     | 9.3       | 9.9  | 2.5     | 1.3   | 3.7                        | 0.2                  |
| A_0141 | dTDP                          | 164628      | HMDB0001274                            | N.D.                   | N.D.  | N.D.  | N.D.  | N.D.  | N.D.    | N.D.    | N.D.    | N.D.    | N.D.    | N.A.      | N.A. | N.A.    | N.A.  | N.A.                       | N.A.                 |
| A_0122 | dTMP                          | 9700        | HMDB0001227                            | N.D.                   | N.D.  | N.D.  | N.D.  | N.D.  | N.D.    | N.D.    | N.D.    | N.D.    | N.D.    | N.A.      | N.A. | N.A.    | N.A.  | N.A.                       | N.A.                 |
| A_0154 | dTTP                          | 64968       | HMDB0001342                            | N.D.                   | N.D.  | N.D.  | N.D.  | N.D.  | N.D.    | N.D.    | N.D.    | N.D.    | N.D.    | N.A.      | N.A. | N.A.    | N.A.  | N.A.                       | N.A.                 |
| A_0087 | Erythrose 4-phosphate         | 122357      | HMDB0001321                            | N.D.                   | N.D.  | N.D.  | N.D.  | N.D.  | N.D.    | N.D.    | N.D.    | N.D.    | N.D.    | N.A.      | N.A. | N.A.    | N.A.  | N.A.                       | N.A.                 |
| A_0128 | Fructose 1,6-diphosphate      | 172313      | HMDB0001058                            | 29                     | 0.6   | 54    | 6.4   | 1.1   | 6.3     | 1.5     | 1.4     | 4.4     | 4.8     | 18        | 23   | 3.7     | 2.2   | 5.0                        | 0.2                  |
| A_0107 | Fructose 6-phosphate          | 603         | HMDB00000124                           | 12                     | 0.4   | 11    | 2.1   | 1.4   | 1.1     | N.D.    | 0.5     | 1.9     | 2.4     | 5.5       | 5.8  | 1.5     | 0.8   | 3.8                        | 0.2                  |
| A_0012 | Fumaric acid                  | 444972      | HMDB0000134                            | 13                     | N.D.  | 18    | 9.1   | 4.0   | 5.9     | 8.4     | N.D.    | 6.3     | 5.8     | 11        | 6.0  | 6.6     | 1.2   | 1.7                        | 0.2                  |
| C_0021 | GABA                          | 119         | HMDB0000112                            | 2.1                    | 1.6   | 19    | 2.2   | 2.2   | 2.0     | 2.5     | 1.0     | 2.6     | 1.6     | 5.3       | 7.4  | 1.9     | 0.7   | 2.8                        | 0.4                  |
| A_0150 | GDP                           | 8977        | HMDB0001201                            | 2.1                    | 0.7   | 6.2   | 1.8   | 2.0   | 1.1     | 2.1     | 1.2     | 1.7     | 1.2     | 2.6       | 2.1  | 1.5     | 0.4   | 1.8                        | 0.3                  |
| C_0089 | Gln                           | 738         | HMDB0000641 HMDB00003423               | 240                    | 127   | 553   | 180   | 148   | 135     | 155     | 132     | 126     | 144     | 250       | 175  | 139     | 11    | 1.8                        | 0.2                  |
| C_0090 | Glu                           | 611         | HMDB0000148 HMDB00003339               | 258                    | 116   | 498   | 193   | 139   | 106     | 264     | 112     | 169     | 111     | 241       | 154  | 152     | 67    | 1.6                        | 0.3                  |
| A_0086 | Gluconic acid                 | 10690       | HMDB00000625                           | 5.2                    | 3.7   | 7.6   | 4.7   | 2.5   | 2.6     | 4.0     | 3.1     | 3.9     | 3.2     | 4.8       | 19   | 3.4     | 0.6   | 1.4                        | 0.2                  |
| A_0106 | Glucose 1-phosphate           | 65533       | HMDB0001586                            | 7.7                    | 0.7   | 8.6   | 2.4   | 1.2   | 1.8     | 1.2     | 1.5     | 1.4     | 2.1     | 4.1       | 3.7  | 1.6     | 0.4   | 2.6                        | 0.2                  |
| A_0110 | Glucose 6-phosphate           | 5958        | HMDB0001401                            | 5.7                    | 1.8   | 3.3   | 8.8   | 5.2   | 0.9     | 0.9     | 0.8     | 6.5     | 11      | 21        | 24   | 4.1     | 4.7   | 5.2                        | 0.2                  |
| C_0205 | Glutathione (GSH)             | 124886      | HMDB0000125                            | 16                     | 9.1   | 25    | 22    | 13    | 0.3     | 0.2     | 3.1     | 1.0     | 7.1     | 17        | 6.4  | 2.4     | 2.9   | 7.1                        | 0.0                  |
| C_0204 | Glutathione (GSSG), _divalent | 65359       |                                        | 76                     | 13    | 167   | 43    | 34    | 32      | 56      | 32      | 40      | 35      | 66        | 61   | 39      | 10    | 1.7                        | 0.4                  |
| C_0006 | Gly                           | 750         | HMDB0000123                            | 289                    | 65    | 418   | 140   | 94    | 88      | 90      | 79      | 65      | 70      | 201       | 149  | 78      | 11    | 2.6                        | 0.1                  |
| A_0057 | Glyceraldehyde 3-phosphate    | 729         | HMDB0001112                            | N.D.                   | N.D.  | N.D.  | N.D.  | N.D.  | N.D.    | N.D.    | N.D.    | N.D.    | N.D.    | N.A.      | N.A. | N.A.    | N.A.  | N.A.                       | N.A.                 |
| A_0059 | Glycerol 3-phosphate          | 439162      | HMDB0000126                            | 210                    | 36    | 257   | 114   | 75    | 45      | 70      | 53      | 62      | 61      | 138       | 93   | 58      | 9.7   | 2.4                        | 0.1                  |
| A_0002 | Glycolic acid                 | 757         | HMDB0000115                            | N.D.                   | N.D.  | N.D.  | N.D.  | N.D.  | N.D.    | N.D.    | N.D.    | N.D.    | N.D.    | N.A.      | N.A. | N.A.    | N.A.  | N.A.                       | N.A.                 |
| A_0001 | Glyoxylic acid                | 760         | HMDB0000119                            | N.D.                   | N.D.  | N.D.  | N.D.  | N.D.  | N.D.    | N.D.    | N.D.    | N.D.    | N.D.    | N.A.      | N.A. | N.A.    | N.A.  | N.A.                       | N.A.                 |
| A_0135 | GMP                           | 6804        | HMDB0001397                            | 8.2                    | 7.0   | 32    | 13    | 18    |         |         |         |         |         |           |      |         |       |                            |                      |

|        |       |      |                             |     |     |    |     |     |     |     |     |     |     |     |     |     |     |     |     |
|--------|-------|------|-----------------------------|-----|-----|----|-----|-----|-----|-----|-----|-----|-----|-----|-----|-----|-----|-----|-----|
| C_0035 | Val   | 1182 | <a href="#">HMDB0000883</a> | 38  | 18  | 53 | 29  | 26  | 20  | 24  | 20  | 18  | 19  | 33  | 14  | 20  | 2.3 | 1.6 | 0.1 |
| C_0010 | β-Ala | 239  | <a href="#">HMDB0000056</a> | 8.0 | 3.9 | 27 | 5.1 | 4.9 | 2.4 | 4.6 | 3.0 | 3.1 | 3.5 | 9.7 | 9.6 | 3.3 | 0.8 | 3.0 | 0.2 |

N.A.: Not Available; N.D.: Not Detected  
¶ The ratio of the detected mean values between the two groups.  
|| Welch's t-test (\*p<0.05, \*\*p<0.01, \*\*\*p<0.001)
