# Supplementary material for: Body Fat-Reducing Effects of Whey Protein Diet in Male Mice
Source: MDPI journal article supplement (doi:10.3390/nu15102263), 2023-05-10
Supplement: s1 [file s1]

**Supplementary Table S1. Principal component score**

|     | Contribution rate (%) | Whey   |       |        |       |       | Casein  |         |         |         |         |
|-----|-----------------------|--------|-------|--------|-------|-------|---------|---------|---------|---------|---------|
|     |                       | whey2  | whey3 | whey4  | whey5 | whey6 | casein2 | casein3 | casein4 | casein5 | casein6 |
| PC1 | 54.74                 | -11.31 | 10.39 | -36.93 | 2.29  | 6.28  | 7.13    | 3.04    | 7.02    | 5.30    | 6.79    |
| PC2 | 11.92                 | 17.19  | -0.89 | -7.06  | 2.83  | 1.27  | -1.63   | -4.71   | -3.16   | -1.71   | -2.12   |
| PC3 | 9.84                  | -3.20  | 9.10  | 2.46   | 4.77  | 6.72  | 0.03    | -7.20   | -1.95   | -10.28  | -0.46   |
| PC4 | 5.86                  | 1.19   | -0.03 | -0.10  | -1.21 | -5.56 | 11.52   | 0.65    | 0.39    | -5.03   | -1.82   |
| PC5 | 4.49                  | -0.23  | 4.11  | 1.14   | -1.94 | -3.33 | 1.86    | -8.04   | -1.41   | 6.76    | 1.07    |
| PC6 | 4.03                  | 0.06   | -4.35 | -0.01  | -0.59 | 0.10  | 0.62    | -2.66   | -0.67   | -2.54   | 10.04   |
| PC7 | 3.58                  | -2.00  | -5.54 | 0.07   | 3.28  | 5.19  | 4.12    | -2.10   | -3.32   | 2.87    | -2.56   |
| PC8 | 3.26                  | 0.36   | -2.56 | 0.25   | -2.13 | 2.06  | 0.04    | -3.97   | 8.58    | -0.72   | -1.91   |
| PC9 | 2.27                  | -1.03  | -1.12 | -0.24  | 6.97  | -4.27 | -1.21   | -1.06   | 1.98    | 0.08    | -0.08   |

PC, principal component
