# Supplementary material for: Body Fat-Reducing Effects of Whey Protein Diet in Male Mice
Source: MDPI journal article supplement (doi:10.3390/nu15102263), 2023-05-10
Supplement: s1 [file s1]

Supplementary Table S2. Metabolites and principal component score

|        | Compound name                      | PubChem CID              | HMDB ID                                             | m/z     | MT/RT | PC1      | PC2      |
|--------|------------------------------------|--------------------------|-----------------------------------------------------|---------|-------|----------|----------|
| A_0003 | Crotonic acid                      | <a href="#">637090</a>   |                                                     | 85.029  | 9.15  | 1.7E-01  | 4.0E-01  |
| A_0005 | Butyric acid                       | <a href="#">264</a>      | <a href="#">HMDB0000039</a>                         | 87.045  | 8.43  | -8.2E-01 | -2.8E-02 |
|        | Isobutyric acid                    | <a href="#">6590</a>     | <a href="#">HMDB0001873</a>                         |         |       |          |          |
| A_0006 | Lactic acid                        | <a href="#">612</a>      | <a href="#">HMDB0000190,HMDB0001311</a>             | 89.024  | 9.14  | -9.7E-01 | -2.3E-01 |
|        | Isovaleric acid                    | <a href="#">10430</a>    | <a href="#">HMDB0000718</a>                         |         |       |          |          |
| A_0007 | DL-2-Methylbutyric Acid            | <a href="#">8314</a>     | <a href="#">HMDB0002176</a>                         | 101.061 | 7.95  | -8.6E-01 | 3.0E-01  |
|        | Valeric acid                       | <a href="#">7991</a>     | <a href="#">HMDB0000892</a>                         |         |       |          |          |
| A_0008 | 3-Hydroxybutyric acid              | <a href="#">441</a>      | <a href="#">HMDB0000011,HMDB0000357,HMDB0000442</a> | 103.040 | 8.16  | -2.4E-01 | -1.4E-01 |
| A_0009 | 2-Hydroxybutyric acid              | <a href="#">440864</a>   | <a href="#">HMDB0000008</a>                         | 103.040 | 8.36  | -2.6E-01 | -3.6E-01 |
| A_0010 | 2-Hydroxyisobutyric acid           | <a href="#">11671</a>    | <a href="#">HMDB0000729</a>                         | 103.040 | 8.45  | -9.7E-01 | -1.3E-01 |
| A_0011 | Glyceric acid                      | <a href="#">439194</a>   | <a href="#">HMDB0000139,HMDB0006372</a>             | 105.019 | 8.81  | -7.7E-01 | -4.7E-01 |
| A_0012 | Fumaric acid                       | <a href="#">444972</a>   | <a href="#">HMDB0000134</a>                         | 115.003 | 17.83 | -8.9E-01 | 1.6E-01  |
| A_0014 | Hexanoic acid                      | <a href="#">8892</a>     | <a href="#">HMDB0000535</a>                         | 115.076 | 7.66  | -6.8E-01 | 1.5E-01  |
| A_0015 | N-Acetylglucine                    | <a href="#">10972</a>    | <a href="#">HMDB0000532</a>                         | 116.035 | 8.14  | -7.4E-01 | 4.1E-01  |
| A_0016 | Succinic acid                      | <a href="#">1110</a>     | <a href="#">HMDB0000254</a>                         | 117.019 | 15.74 | -9.1E-01 | -3.2E-01 |
| A_0017 | β-Hydroxyisovaleric acid           | <a href="#">69362</a>    | <a href="#">HMDB0000754</a>                         | 117.055 | 7.84  | -5.5E-01 | 1.3E-01  |
| A_0018 | 2-Hydroxyvaleric acid              | <a href="#">98009</a>    | <a href="#">HMDB0001863</a>                         | 117.056 | 7.94  | -9.7E-01 | 1.4E-01  |
| A_0019 | Isethionic acid                    | <a href="#">7866</a>     | <a href="#">HMDB0003903</a>                         | 124.991 | 9.70  | -9.8E-01 | -1.0E-01 |
| A_0020 | 5-Oxoproline                       | <a href="#">7405</a>     | <a href="#">HMDB0000267</a>                         | 128.035 | 8.10  | -5.4E-01 | 1.8E-01  |
| A_0021 | 5-Oxohexanoic acid                 | <a href="#">18407</a>    |                                                     | 129.056 | 7.79  | 1.7E-01  | -1.1E-01 |
|        | 4-Methyl-2-oxovaleric acid         | <a href="#">70</a>       | <a href="#">HMDB0000695</a>                         |         |       |          |          |
| A_0022 | 3-Methyl-2-oxovaleric acid         | <a href="#">47</a>       | <a href="#">HMDB0000491</a>                         | 129.056 | 8.18  | -7.0E-01 | -3.8E-01 |
|        | 2-Oxohexanoic acid                 | <a href="#">159664</a>   | <a href="#">HMDB0001864</a>                         |         |       |          |          |
| A_0023 | Heptanoic acid                     | <a href="#">8094</a>     | <a href="#">HMDB0000666</a>                         | 129.092 | 7.41  | -4.1E-01 | 1.3E-01  |
| A_0024 | N-Acetylalanine                    | <a href="#">88064</a>    | <a href="#">HMDB0000766</a>                         | 130.051 | 7.61  | 1.5E-01  | 5.4E-01  |
| A_0025 | 6-Hydroxyhexanoic acid             | <a href="#">14490</a>    |                                                     | 131.071 | 7.29  | -9.1E-01 | 3.6E-01  |
| A_0026 | 2-Hydroxy-4-methylvaleric acid     | <a href="#">439960</a>   | <a href="#">HMDB0000624</a>                         | 131.072 | 7.59  | -9.5E-01 | 2.0E-01  |
| A_0027 | Malic acid                         | <a href="#">525</a>      | <a href="#">HMDB0000156,HMDB0000744</a>             | 133.014 | 15.97 | -8.4E-01 | 2.8E-01  |
| A_0028 | Threonic acid                      | <a href="#">5460407</a>  | <a href="#">HMDB0000943</a>                         | 135.030 | 7.90  | -8.8E-01 | -2.9E-01 |
| A_0029 | 6-Hydroxynicotinic acid            | <a href="#">72924</a>    | <a href="#">HMDB0002658</a>                         | 138.019 | 8.04  | 3.3E-01  | -2.2E-01 |
| A_0030 | Ethanolamine phosphate             | <a href="#">1015</a>     | <a href="#">HMDB0000224</a>                         | 140.012 | 6.89  | -9.9E-01 | -1.1E-01 |
| A_0031 | N-Ethylmaleimide_+H <sub>2</sub> O | <a href="#">4362</a>     |                                                     | 142.051 | 7.47  | -1.2E-02 | 3.5E-01  |
| A_0032 | Octanoic acid                      | <a href="#">379</a>      | <a href="#">HMDB0000482</a>                         | 143.107 | 7.20  | -5.1E-01 | 6.3E-01  |
| A_0033 | XA0004                             |                          |                                                     | 144.031 | 7.97  | -9.3E-01 | 3.1E-01  |
| A_0034 | 4-Acetamidobutanoic acid           | <a href="#">18189</a>    | <a href="#">HMDB0003681</a>                         | 144.066 | 7.39  | -2.8E-01 | 2.2E-01  |
| A_0035 | 2-Oxoglutaric acid                 | <a href="#">51</a>       | <a href="#">HMDB0000208</a>                         | 145.013 | 15.92 | -9.1E-01 | -3.7E-01 |
| A_0036 | 2-Hydroxyglutaric acid             | <a href="#">43</a>       | <a href="#">HMDB0000606,HMDB0000694</a>             | 147.029 | 13.51 | -7.4E-01 | -3.4E-01 |
| A_0037 | Tartaric acid                      | <a href="#">444305</a>   | <a href="#">HMDB0000956</a>                         | 149.009 | 16.39 | -2.7E-01 | -2.3E-01 |
| A_0038 | 3-Phenylpropionic acid             | <a href="#">107</a>      | <a href="#">HMDB0000764</a>                         | 149.060 | 7.56  | -1.4E-01 | 7.3E-01  |
| A_0039 | Cysteinesulfinic acid              | <a href="#">1549098</a>  | <a href="#">HMDB0000996</a>                         | 152.003 | 8.15  | -9.4E-02 | 6.1E-01  |
| A_0040 | Orotic acid                        | <a href="#">967</a>      | <a href="#">HMDB0000226</a>                         | 155.010 | 8.41  | -9.7E-01 | -1.7E-01 |
| A_0041 | Dihydroorotic acid                 | <a href="#">439216</a>   | <a href="#">HMDB0000528</a>                         | 157.025 | 8.00  | -9.1E-01 | -3.7E-01 |
| A_0042 | 2-Oxoctanoic acid                  | <a href="#">67600</a>    |                                                     | 157.087 | 7.33  | 1.7E-01  | 2.8E-02  |
| A_0043 | Pelargonic acid                    | <a href="#">8158</a>     | <a href="#">HMDB0000847</a>                         | 157.123 | 7.02  | -6.4E-01 | 1.8E-01  |
| A_0044 | 8-Hydroxyoctanoic acid             | <a href="#">69820</a>    |                                                     | 159.103 | 6.94  | 4.3E-01  | -6.0E-02 |
| A_0045 | 2-Hydroxyoctanoic acid             | <a href="#">94180</a>    | <a href="#">HMDB0000711</a>                         | 159.103 | 7.01  | -8.2E-01 | -3.1E-01 |
| A_0046 | 3-Hydroxy-3-methylglutaric acid    | <a href="#">1662</a>     |                                                     | 161.045 | 12.60 | -2.8E-01 | 9.1E-01  |
| A_0047 | N-Acetylcysteine                   | <a href="#">12035</a>    | <a href="#">HMDB0001890</a>                         | 162.024 | 7.54  | -2.0E-01 | 6.5E-01  |
|        | o-Coumaric acid                    | <a href="#">637540</a>   | <a href="#">HMDB0002641</a>                         |         |       |          |          |
| A_0048 | p-Coumaric acid                    | <a href="#">637542</a>   | <a href="#">HMDB0002035</a>                         | 163.039 | 7.46  | 1.8E-01  | -8.6E-02 |
| A_0049 | 4-Hydroxyphenylglyoxylic acid      | <a href="#">355</a>      |                                                     | 165.019 | 11.08 | -9.1E-01 | -3.7E-01 |
| A_0050 | Terephthalic acid                  | <a href="#">7489</a>     | <a href="#">HMDB0002428</a>                         | 165.019 | 13.29 | 7.1E-01  | -1.3E-01 |
| A_0051 | Perillic acid                      | <a href="#">1256</a>     | <a href="#">HMDB0004586</a>                         | 165.091 | 7.02  | -4.0E-01 | -2.6E-01 |
| A_0052 | XA0012                             |                          |                                                     | 166.018 | 8.02  | -9.4E-01 | -9.3E-02 |
| A_0053 | Phosphoenolpyruvic acid            | <a href="#">1005</a>     | <a href="#">HMDB0000263</a>                         | 166.974 | 15.83 | -5.4E-01 | 5.9E-01  |
| A_0054 | Uric acid                          | <a href="#">1175</a>     | <a href="#">HMDB0000289</a>                         | 167.021 | 7.62  | -7.1E-01 | -3.7E-02 |
|        | Homogentisic acid                  | <a href="#">780</a>      | <a href="#">HMDB0000130</a>                         |         |       |          |          |
| A_0055 | p-Hydroxymandelic acid             | <a href="#">328</a>      | <a href="#">HMDB0000822</a>                         | 167.035 | 7.38  | -9.7E-01 | -2.0E-01 |
| A_0056 | Dihydroxyacetone phosphate         | <a href="#">668</a>      | <a href="#">HMDB0001473</a>                         | 168.990 | 10.61 | -9.8E-01 | 6.9E-02  |
| A_0058 | Glycerol 2-phosphate               | <a href="#">2526</a>     |                                                     | 171.006 | 10.44 | -9.1E-01 | -3.7E-01 |
| A_0059 | Glycerol 3-phosphate               | <a href="#">439162</a>   | <a href="#">HMDB0000126</a>                         | 171.006 | 10.16 | -9.5E-01 | 3.1E-01  |
| A_0060 | Decanoic acid                      | <a href="#">2969</a>     | <a href="#">HMDB0000511</a>                         | 171.139 | 6.87  | -3.7E-01 | 3.7E-01  |
|        | Isovalerylalanine                  | <a href="#">129285</a>   | <a href="#">HMDB0000747</a>                         |         |       |          |          |
| A_0061 | N-Acetylleucine                    | <a href="#">70912</a>    | <a href="#">HMDB0011756</a>                         | 172.098 | 6.92  | -2.3E-01 | 3.2E-01  |
| A_0062 | cis-Aconitic acid                  | <a href="#">643757</a>   | <a href="#">HMDB0000072</a>                         | 173.009 | 18.72 | -9.3E-01 | -2.1E-01 |
| A_0063 | Suberic acid                       | <a href="#">10457</a>    | <a href="#">HMDB0000893</a>                         | 173.082 | 10.74 | 5.3E-01  | -2.4E-01 |
| A_0064 | N-Acetylaspartic acid              | <a href="#">65065</a>    | <a href="#">HMDB0000812</a>                         | 174.041 | 11.95 | -6.2E-01 | -3.1E-01 |
| A_0065 | Ascorbic acid                      | <a href="#">54670067</a> | <a href="#">HMDB0000044</a>                         | 175.024 | 7.28  | -2.2E-01 | 1.6E-01  |

|        |                                         |                          |                              |         |       |          |          |
|--------|-----------------------------------------|--------------------------|------------------------------|---------|-------|----------|----------|
| A_0066 | <i>N</i> -Carbamoylaspartic acid        | <a href="#">93072</a>    | <a href="#">HMDB0000828</a>  | 175.035 | 12.50 | -9.1E-01 | -3.7E-01 |
| A_0067 | Homovanillic acid                       | <a href="#">1738</a>     | <a href="#">HMDB0000118</a>  | 181.050 | 7.11  | -9.6E-01 | 8.5E-02  |
|        | Hydroxyphenyllactic acid                | <a href="#">9378</a>     | <a href="#">HMDB0000755</a>  |         |       |          |          |
| A_0068 | Homocysteic acid                        | <a href="#">177491</a>   | <a href="#">HMDB0002205</a>  | 182.013 | 8.02  | 2.6E-01  | -4.7E-02 |
| A_0069 | O-Phosphoserine                         | <a href="#">68841</a>    | <a href="#">HMDB0000272</a>  | 184.001 | 10.30 | -9.7E-02 | 6.6E-01  |
| A_0070 | 2-Phosphoglyceric acid                  | <a href="#">439278</a>   | <a href="#">HMDB0003391</a>  | 184.985 | 14.76 | -5.6E-01 | 5.1E-01  |
| A_0071 | 3-Phosphoglyceric acid                  | <a href="#">439183</a>   | <a href="#">HMDB0000807</a>  | 184.986 | 15.04 | -5.4E-01 | 5.9E-01  |
| A_0072 | Undecanoic acid                         | <a href="#">8180</a>     | <a href="#">HMDB0000947</a>  | 185.154 | 6.73  | -1.5E-01 | 1.3E-01  |
| A_0073 | XA0017                                  |                          |                              | 186.114 | 6.85  | -4.6E-01 | 3.6E-01  |
| A_0074 | <i>N</i> -Acetylglutamine               | <a href="#">25561</a>    | <a href="#">HMDB0006029</a>  | 187.073 | 6.96  | -9.1E-01 | -3.7E-01 |
| A_0075 | Azelaic acid                            | <a href="#">2266</a>     | <a href="#">HMDB0000784</a>  | 187.098 | 10.23 | 3.7E-01  | -1.3E-01 |
| A_0076 | 10-Hydroxydecanoic acid                 | <a href="#">74300</a>    |                              | 187.134 | 6.67  | -8.0E-01 | -4.2E-01 |
| A_0077 | Kynurenic acid                          | <a href="#">3845</a>     | <a href="#">HMDB0000715</a>  | 188.036 | 7.35  | -9.7E-01 | -1.6E-01 |
| A_0078 | <i>N</i> -Acetylglutamic acid           | <a href="#">70914</a>    | <a href="#">HMDB0001138</a>  | 188.056 | 10.99 | -8.3E-01 | -2.0E-01 |
| A_0079 | <i>N</i> -Acetylmethionine              | <a href="#">448580</a>   | <a href="#">HMDB0011745</a>  | 190.054 | 6.99  | -5.7E-01 | 4.6E-01  |
| A_0080 | Isocitric acid                          | <a href="#">1198</a>     | <a href="#">HMDB0000193</a>  | 191.019 | 19.08 | -3.6E-01 | -5.0E-01 |
| A_0081 | Citric acid                             | <a href="#">311</a>      | <a href="#">HMDB0000094</a>  | 191.020 | 18.16 | -9.7E-01 | -1.8E-01 |
| A_0082 | XA0019                                  |                          |                              | 191.020 | 7.16  | -9.8E-01 | -2.1E-02 |
| A_0083 | Quinic acid                             | <a href="#">6508</a>     | <a href="#">HMDB0003072</a>  | 191.056 | 6.97  | 1.8E-01  | 2.3E-01  |
| A_0084 | Phenaceturic acid                       | <a href="#">68144</a>    | <a href="#">HMDB0000821</a>  | 192.066 | 7.06  | -5.3E-01 | 2.2E-01  |
| A_0085 | Galacturonic acid                       | <a href="#">439215</a>   | <a href="#">HMDB0002545</a>  | 193.035 | 6.97  | -5.0E-01 | 1.0E-01  |
|        | Glucuronic acid                         | <a href="#">94715</a>    | <a href="#">HMDB0000127</a>  |         |       |          |          |
| A_0086 | Gluconic acid                           | <a href="#">10690</a>    | <a href="#">HMDB0000625</a>  | 195.051 | 7.05  | -9.3E-01 | 1.7E-02  |
| A_0088 | Lauric acid                             | <a href="#">3893</a>     | <a href="#">HMDB0000638</a>  | 199.171 | 6.62  | -4.3E-01 | 4.1E-01  |
| A_0089 | Sebacic acid                            | <a href="#">5192</a>     | <a href="#">HMDB0000792</a>  | 201.112 | 9.81  | 1.7E-01  | -1.1E-01 |
| A_0090 | Xanthurenic acid                        | <a href="#">5699</a>     | <a href="#">HMDB0000881</a>  | 204.029 | 10.29 | 1.3E-01  | -9.0E-02 |
| A_0091 | Indole-3-lactic acid                    | <a href="#">676157</a>   | <a href="#">HMDB0000671</a>  | 204.066 | 7.06  | -9.8E-01 | 4.7E-02  |
|        | 5-Methoxyindoleacetic acid              | <a href="#">18986</a>    | <a href="#">HMDB0004096</a>  |         |       |          |          |
| A_0092 | Mucic acid                              | <a href="#">3037582</a>  | <a href="#">HMDB0000639</a>  | 209.030 | 11.60 | -9.6E-01 | -1.2E-01 |
| A_0093 | Phosphocreatine                         | <a href="#">9548602</a>  | <a href="#">HMDB0001511</a>  | 210.028 | 10.26 | -1.6E-01 | -2.8E-01 |
| A_0094 | 3-Indoxylsulfuric acid                  | <a href="#">10258</a>    | <a href="#">HMDB0000682</a>  | 212.002 | 8.14  | 6.5E-02  | 1.2E-01  |
| A_0095 | Tridecanoic acid                        | <a href="#">12530</a>    | <a href="#">HMDB0000910</a>  | 213.185 | 6.50  | -6.8E-01 | 2.4E-01  |
| A_0096 | Pantothenic acid                        | <a href="#">6613</a>     | <a href="#">HMDB0000210</a>  | 218.103 | 6.61  | -8.3E-01 | 3.3E-01  |
| A_0097 | Myristoleic acid                        | <a href="#">5281119</a>  | <a href="#">HMDB0002000</a>  | 225.186 | 6.46  | -4.4E-01 | 2.5E-01  |
| A_0098 | Myristic acid                           | <a href="#">11005</a>    | <a href="#">HMDB0000806</a>  | 227.201 | 6.44  | -8.1E-01 | 9.0E-02  |
| A_0099 | Ribulose 5-phosphate                    | <a href="#">439184</a>   | <a href="#">HMDB0000618</a>  | 229.011 | 9.29  | -5.9E-01 | 7.0E-01  |
| A_0100 | Ribose 5-phosphate                      | <a href="#">439167</a>   | <a href="#">HMDB0001548</a>  | 229.011 | 8.95  | -2.2E-01 | 8.9E-01  |
| A_0101 | XA0033                                  |                          |                              | 242.080 | 6.57  | -9.4E-01 | 3.3E-01  |
| A_0102 | XA0080                                  | <a href="#">440992</a>   |                              | 243.027 | 8.65  | -9.0E-01 | -3.7E-01 |
| A_0103 | γ-Glu-Taurine                           | <a href="#">68759</a>    | <a href="#">HMDB0004195</a>  | 253.051 | 6.98  | -9.7E-01 | 1.9E-01  |
| A_0104 | Ascorbate 2-sulfate                     | <a href="#">54676864</a> |                              | 254.982 | 11.79 | -6.8E-01 | 5.8E-02  |
| A_0105 | XA0035                                  |                          |                              | 254.982 | 11.28 | -4.7E-02 | 1.1E-01  |
| A_0106 | Glucose 1-phosphate                     | <a href="#">65533</a>    | <a href="#">HMDB0001586</a>  | 259.022 | 8.62  | -9.2E-01 | 3.4E-01  |
| A_0107 | Fructose 6-phosphate                    | <a href="#">603</a>      | <a href="#">HMDB0000124</a>  | 259.022 | 8.48  | -8.5E-01 | 4.9E-01  |
| A_0108 | <i>myo</i> -Inositol 1-phosphate        | <a href="#">107737</a>   | <a href="#">HMDB0000213</a>  | 259.022 | 8.75  | -4.4E-01 | 3.1E-01  |
|        | <i>myo</i> -Inositol 3-phosphate        | <a href="#">440194</a>   | <a href="#">HMDB00006814</a> |         |       |          |          |
| A_0109 | <i>myo</i> -Inositol 2-phosphate        | <a href="#">160886</a>   |                              | 259.022 | 8.94  | -4.8E-02 | 8.4E-01  |
| A_0110 | Glucose 6-phosphate                     | <a href="#">5958</a>     | <a href="#">HMDB0001401</a>  | 259.023 | 8.39  | -7.1E-01 | 6.7E-01  |
| A_0111 | 2,3-Diphosphoglyceric acid              | <a href="#">186004</a>   | <a href="#">HMDB0001294</a>  | 264.950 | 14.41 | -2.2E-02 | 1.9E-01  |
| A_0112 | 6-Phosphogluconic acid                  | <a href="#">91493</a>    | <a href="#">HMDB0001316</a>  | 275.016 | 12.02 | -5.8E-01 | 7.6E-01  |
| A_0113 | Xanthosine                              | <a href="#">64959</a>    | <a href="#">HMDB0000299</a>  | 283.066 | 6.56  | -7.6E-01 | 6.1E-01  |
| A_0114 | Orotidine                               | <a href="#">92751</a>    | <a href="#">HMDB0000788</a>  | 287.051 | 6.80  | -9.7E-01 | -1.8E-01 |
| A_0115 | Sedoheptulose 7-phosphate               | <a href="#">165007</a>   | <a href="#">HMDB0001068</a>  | 289.032 | 8.21  | -5.5E-01 | 7.4E-01  |
| A_0116 | Retinoic acid                           | <a href="#">444795</a>   | <a href="#">HMDB0001852</a>  | 299.202 | 6.24  | -7.7E-02 | 7.2E-01  |
| A_0117 | <i>N</i> -Acetylglucosamine 1-phosphate | <a href="#">440272</a>   | <a href="#">HMDB0001367</a>  | 300.048 | 8.16  | -9.3E-01 | 3.2E-01  |
| A_0118 | <i>N</i> -Acetylglucosamine 6-phosphate | <a href="#">440996</a>   | <a href="#">HMDB0001062</a>  | 300.048 | 7.84  | -6.5E-01 | 6.5E-01  |
| A_0119 | cCMP                                    | <a href="#">19236</a>    | <a href="#">HMDB0011691</a>  | 304.035 | 6.56  | 7.5E-02  | -2.5E-01 |
|        | 2',3'-cCMP                              | <a href="#">68934</a>    |                              |         |       |          |          |
| A_0120 | <i>N</i> -Acetylneuraminic acid         | <a href="#">439197</a>   | <a href="#">HMDB0000230</a>  | 308.099 | 6.22  | -9.9E-01 | -1.5E-02 |
| A_0121 | Ribulose 1,5-diphosphate                | <a href="#">123658</a>   |                              | 308.980 | 12.65 | -3.3E-01 | 7.6E-01  |
| A_0123 | 3'-CMP                                  | <a href="#">66535</a>    |                              | 322.044 | 8.34  | 1.7E-01  | -2.9E-01 |
| A_0124 | CMP                                     | <a href="#">6131</a>     | <a href="#">HMDB0000095</a>  | 322.044 | 8.17  | -7.9E-01 | -5.5E-01 |
| A_0125 | UMP                                     | <a href="#">6030</a>     | <a href="#">HMDB0000288</a>  | 323.026 | 8.33  | -5.9E-01 | -7.0E-01 |
| A_0126 | <i>N</i> -Glycolylneuraminic acid       | <a href="#">440001</a>   | <a href="#">HMDB0000833</a>  | 324.093 | 6.20  | 2.3E-01  | -2.3E-01 |
| A_0127 | cAMP                                    | <a href="#">6076</a>     | <a href="#">HMDB0000058</a>  | 328.045 | 6.46  | -9.1E-01 | -3.7E-01 |
| A_0128 | Fructose 1,6-diphosphate                | <a href="#">172313</a>   | <a href="#">HMDB0001058</a>  | 338.990 | 11.93 | -9.8E-01 | 9.3E-02  |
| A_0130 | AMP                                     | <a href="#">6083</a>     | <a href="#">HMDB0000045</a>  | 346.054 | 7.91  | -7.0E-01 | -6.0E-01 |
| A_0131 | 3'-AMP                                  | <a href="#">41211</a>    | <a href="#">HMDB0003540</a>  | 346.054 | 8.26  | 1.6E-01  | 5.8E-03  |
| A_0132 | IMP                                     | <a href="#">8582</a>     | <a href="#">HMDB0000175</a>  | 347.038 | 8.12  | -8.1E-01 | -1.6E-01 |
| A_0133 | Prostaglandin E <sub>2</sub>            | <a href="#">5280360</a>  | <a href="#">HMDB0001220</a>  | 351.219 | 6.02  | -8.8E-01 | 4.6E-01  |
| A_0134 | Prostaglandin F <sub>2α</sub>           | <a href="#">5280363</a>  | <a href="#">HMDB0001139</a>  | 353.234 | 5.98  | -8.2E-01 | 5.5E-01  |

|        |                                              |                          |                                                           |         |       |          |          |
|--------|----------------------------------------------|--------------------------|-----------------------------------------------------------|---------|-------|----------|----------|
| A_0135 | GMP                                          | <a href="#">6804</a>     | <a href="#">HMDB0001397</a>                               | 362.049 | 7.81  | -5.0E-01 | -6.9E-01 |
| A_0136 | XA0055                                       |                          |                                                           | 368.999 | 11.74 | -8.0E-01 | 5.0E-01  |
| A_0137 | NADPH_divalent                               | <a href="#">5884</a>     | <a href="#">HMDB0000221</a>                               | 371.539 | 9.49  | -9.8E-01 | -1.6E-02 |
| A_0138 | CoA_divalent                                 | <a href="#">87642</a>    | <a href="#">HMDB0001423</a>                               | 382.548 | 8.98  | 1.1E-01  | 1.1E-01  |
| A_0139 | PRPP                                         | <a href="#">7339</a>     | <a href="#">HMDB0000280</a>                               | 388.945 | 13.19 | -9.1E-01 | -3.7E-01 |
| A_0140 | FAD_divalent                                 | <a href="#">643975</a>   | <a href="#">HMDB0001248</a>                               | 391.570 | 6.77  | -9.7E-01 | -8.6E-02 |
| A_0142 | CDP                                          | <a href="#">6132</a>     | <a href="#">HMDB0001546</a>                               | 402.012 | 9.61  | -9.1E-01 | -3.7E-01 |
| A_0143 | UDP                                          | <a href="#">6031</a>     | <a href="#">HMDB0000295</a>                               | 402.994 | 9.75  | -9.4E-01 | -3.2E-01 |
| A_0144 | Acetyl CoA_divalent                          | <a href="#">444493</a>   | <a href="#">HMDB0001206</a>                               | 403.552 | 8.70  | -9.1E-01 | -3.7E-01 |
| A_0145 | Cholic acid                                  | <a href="#">221493</a>   | <a href="#">HMDB0000619</a>                               | 407.280 | 5.95  | 3.2E-01  | -8.3E-02 |
| A_0146 | Thiamine diphosphate                         | <a href="#">1132</a>     | <a href="#">HMDB0001372</a>                               | 423.031 | 6.83  | -8.8E-01 | -4.4E-01 |
| A_0148 | ADP                                          | <a href="#">6022</a>     | <a href="#">HMDB0001341</a>                               | 426.022 | 9.16  | -9.3E-01 | -3.2E-01 |
| A_0149 | 3',5'-ADP                                    | <a href="#">159296</a>   | <a href="#">HMDB0000061</a>                               | 426.022 | 11.02 | -4.0E-01 | 1.4E-01  |
| A_0150 | GDP                                          | <a href="#">8977</a>     | <a href="#">HMDB0001201</a>                               | 442.017 | 8.96  | -9.5E-01 | -2.3E-01 |
| A_0151 | XA0065                                       |                          |                                                           | 445.053 | 6.01  | -9.8E-01 | -6.8E-02 |
| A_0152 | Adenylosuccinic acid                         | <a href="#">447145</a>   | <a href="#">HMDB0000536</a>                               | 462.068 | 11.34 | -2.9E-01 | -3.0E-01 |
| A_0155 | CTP                                          | <a href="#">6176</a>     | <a href="#">HMDB0000082</a>                               | 481.979 | 10.27 | -9.1E-01 | -3.7E-01 |
| A_0156 | UTP                                          | <a href="#">6133</a>     | <a href="#">HMDB0000285</a>                               | 482.961 | 10.43 | -9.3E-01 | -3.3E-01 |
| A_0157 | CDP-choline                                  | <a href="#">13804</a>    | <a href="#">HMDB0001413</a>                               | 487.100 | 5.88  | -9.3E-01 | -9.2E-02 |
| A_0159 | ATP                                          | <a href="#">5957</a>     | <a href="#">HMDB0000538</a>                               | 505.990 | 9.82  | -9.2E-01 | -3.4E-01 |
| A_0160 | Taurocholic acid                             | <a href="#">46783527</a> | <a href="#">HMDB0000036</a>                               | 514.287 | 5.83  | 2.0E-01  | 5.1E-02  |
| A_0161 | GTP                                          | <a href="#">6830</a>     | <a href="#">HMDB0001273</a>                               | 521.988 | 9.60  | -9.6E-01 | -2.4E-01 |
| A_0162 | ADP-ribose                                   | <a href="#">445794</a>   | <a href="#">HMDB0001178</a>                               | 558.064 | 7.28  | 2.5E-01  | -4.1E-01 |
| A_0163 | UDP-galactose                                | <a href="#">23724458</a> | <a href="#">HMDB0000302</a>                               | 565.053 | 7.39  | -9.8E-01 | -3.0E-03 |
|        | UDP-glucose                                  | <a href="#">8629</a>     | <a href="#">HMDB0000286</a>                               |         |       |          |          |
| A_0164 | UDP-glucuronic acid                          | <a href="#">17473</a>    | <a href="#">HMDB0000935</a>                               | 579.024 | 9.30  | -9.0E-01 | -1.5E-01 |
| A_0165 | GDP-fucose                                   | <a href="#">10918995</a> | <a href="#">HMDB0001095</a>                               | 588.079 | 7.14  | -6.9E-01 | -4.0E-01 |
|        | ADP-glucose                                  | <a href="#">16500</a>    | <a href="#">HMDB0006557</a>                               |         |       |          |          |
| A_0166 | NAD <sup>+</sup>                             | <a href="#">5893</a>     | <a href="#">HMDB0000902</a>                               | 662.099 | 5.67  | -9.3E-01 | -3.3E-01 |
| A_0167 | NADP <sup>+</sup>                            | <a href="#">5886</a>     | <a href="#">HMDB0000217</a>                               | 742.064 | 7.98  | -1.0E+00 | 4.4E-02  |
| C_0001 | Urea                                         | <a href="#">1176</a>     | <a href="#">HMDB0000294</a>                               | 61.040  | 18.03 | -9.3E-01 | -8.7E-02 |
| C_0002 | Ethanolamine                                 | <a href="#">700</a>      | <a href="#">HMDB0000149</a>                               | 62.060  | 5.19  | -9.1E-01 | -1.9E-03 |
| C_0003 | 3-Aminopropionitrile                         | <a href="#">1647</a>     | <a href="#">HMDB0004101</a>                               | 71.060  | 5.21  | 2.6E-01  | -4.7E-02 |
| C_0004 | XC0001                                       |                          |                                                           | 72.081  | 5.22  | -2.8E-01 | 9.1E-01  |
| C_0005 | Aminoacetone                                 | <a href="#">215</a>      | <a href="#">HMDB0002134</a>                               | 74.060  | 5.61  | -9.1E-01 | -3.7E-01 |
| C_0006 | Gly                                          | <a href="#">750</a>      | <a href="#">HMDB0000123</a>                               | 76.039  | 6.85  | -9.8E-01 | 2.0E-01  |
| C_0007 | Trimethylamine N-oxide                       | <a href="#">1145</a>     | <a href="#">HMDB0000925</a>                               | 76.076  | 5.40  | -9.6E-01 | -2.5E-01 |
| C_0008 | Morpholine                                   | <a href="#">8083</a>     | <a href="#">HMDB0031581</a>                               | 88.076  | 5.43  | -7.2E-01 | 2.3E-01  |
| C_0009 | Putrescine                                   | <a href="#">1045</a>     | <a href="#">HMDB0001414</a>                               | 89.107  | 3.84  | -9.3E-01 | 2.6E-01  |
| C_0010 | β-Ala                                        | <a href="#">239</a>      | <a href="#">HMDB0000056</a>                               | 90.055  | 6.01  | -9.7E-01 | -1.9E-01 |
| C_0011 | Ala                                          | <a href="#">602</a>      | <a href="#">HMDB0000161</a> , <a href="#">HMDB0001310</a> | 90.055  | 7.42  | -7.4E-01 | -8.2E-02 |
| C_0012 | Sarcosine                                    | <a href="#">1088</a>     | <a href="#">HMDB0000271</a>                               | 90.055  | 7.81  | -9.4E-01 | -2.8E-01 |
| C_0013 | Dimethylaminoethanol                         | <a href="#">7902</a>     | <a href="#">HMDB0032231</a>                               | 90.091  | 5.66  | -8.8E-01 | -2.4E-01 |
| C_0014 | Glycerol                                     | <a href="#">753</a>      | <a href="#">HMDB0000131</a>                               | 93.055  | 18.85 | 2.6E-01  | 2.9E-01  |
| C_0015 | Phenol                                       | <a href="#">996</a>      | <a href="#">HMDB0000228</a>                               | 95.047  | 4.41  | -9.2E-01 | -1.9E-01 |
| C_0016 | Cyclohexylamine                              | <a href="#">7965</a>     |                                                           | 100.112 | 6.26  | -5.6E-01 | 2.6E-02  |
| C_0017 | Acetoacetamide                               | <a href="#">80077</a>    |                                                           | 102.055 | 18.87 | 1.8E-01  | -1.2E-01 |
| C_0018 | Homoserinelactone                            | <a href="#">73509</a>    |                                                           | 102.056 | 5.78  | -9.1E-01 | -3.7E-01 |
| C_0019 | Cadaverine                                   | <a href="#">273</a>      | <a href="#">HMDB0002322</a>                               | 103.123 | 4.06  | -6.6E-01 | 5.4E-01  |
| C_0020 | N,N-Dimethylglycine                          | <a href="#">673</a>      | <a href="#">HMDB0000092</a>                               | 104.071 | 9.03  | -7.8E-01 | -4.6E-02 |
| C_0021 | GABA                                         | <a href="#">119</a>      | <a href="#">HMDB0000112</a>                               | 104.071 | 6.30  | -9.2E-01 | -3.6E-01 |
| C_0022 | 2-Aminoisobutyric acid                       | <a href="#">6119</a>     | <a href="#">HMDB0001906</a>                               | 104.071 | 7.91  | -6.2E-02 | -4.5E-01 |
|        | 2-Aminobutyric acid                          | <a href="#">6657</a>     | <a href="#">HMDB0000452</a>                               |         |       |          |          |
| C_0023 | 3-Aminobutyric acid                          | <a href="#">10932</a>    |                                                           | 104.071 | 6.50  | 2.0E-01  | -1.6E-01 |
| C_0024 | Choline                                      | <a href="#">305</a>      | <a href="#">HMDB0000097</a>                               | 105.110 | 5.61  | -9.8E-01 | 1.4E-01  |
| C_0025 | Ser                                          | <a href="#">617</a>      | <a href="#">HMDB0000187</a> , <a href="#">HMDB0003406</a> | 106.050 | 8.26  | -9.8E-01 | 1.5E-01  |
| C_0026 | Diethanolamine                               | <a href="#">8113</a>     | <a href="#">HMDB0004437</a>                               | 106.086 | 6.25  | 1.3E-01  | 9.2E-02  |
| C_0027 | Hypotaurine                                  | <a href="#">107812</a>   | <a href="#">HMDB0000965</a>                               | 110.027 | 14.99 | -9.6E-01 | -2.3E-01 |
| C_0029 | Histamine                                    | <a href="#">774</a>      | <a href="#">HMDB0000870</a>                               | 112.086 | 3.90  | -8.6E-01 | -7.6E-03 |
| C_0030 | Uracil                                       | <a href="#">1174</a>     | <a href="#">HMDB0000300</a>                               | 113.034 | 18.86 | -5.1E-01 | 7.7E-01  |
| C_0031 | Creatinine                                   | <a href="#">588</a>      | <a href="#">HMDB0000562</a>                               | 114.066 | 5.97  | -7.3E-01 | -1.8E-01 |
| C_0032 | 3-Amino-2-piperidone                         | <a href="#">5200225</a>  | <a href="#">HMDB0000323</a>                               | 115.086 | 6.21  | 1.7E-02  | 2.5E-02  |
| C_0033 | Pro                                          | <a href="#">614</a>      | <a href="#">HMDB0000162</a> , <a href="#">HMDB0003411</a> | 116.070 | 8.90  | -9.8E-01 | -5.9E-02 |
| C_0034 | Guanidoacetic acid                           | <a href="#">763</a>      | <a href="#">HMDB0000128</a>                               | 118.061 | 6.75  | 2.2E-02  | -3.6E-01 |
| C_0035 | Val                                          | <a href="#">1182</a>     | <a href="#">HMDB0000883</a>                               | 118.086 | 8.21  | -9.7E-01 | 1.5E-01  |
| C_0036 | Betaine                                      | <a href="#">247</a>      | <a href="#">HMDB0000043</a>                               | 118.086 | 9.29  | -9.9E-01 | -4.4E-02 |
| C_0037 | 5-Aminovaleric acid                          | <a href="#">138</a>      | <a href="#">HMDB0003355</a>                               | 118.086 | 6.58  | -3.9E-01 | 5.3E-01  |
| C_0038 | Thr                                          | <a href="#">6288</a>     | <a href="#">HMDB0000167</a>                               | 120.065 | 8.68  | -9.9E-01 | -7.1E-02 |
| C_0039 | Homoserine                                   | <a href="#">12647</a>    | <a href="#">HMDB0000719</a>                               | 120.065 | 8.31  | -9.0E-01 | 8.1E-02  |
| C_0040 | Betaine aldehyde_+H <sub>2</sub> O           | <a href="#">249</a>      | <a href="#">HMDB0001252</a>                               | 120.102 | 6.09  | -4.2E-01 | 6.4E-01  |
| C_0041 | 4-Hydroxyphenethyl alcohol_-H <sub>2</sub> O | <a href="#">10393</a>    | <a href="#">HMDB0004284</a>                               | 121.065 | 18.91 | -6.3E-01 | -1.6E-01 |

|        |                                                        |                                                  |                                                            |         |       |          |          |
|--------|--------------------------------------------------------|--------------------------------------------------|------------------------------------------------------------|---------|-------|----------|----------|
| C_0042 | Anserine_divalent                                      | <a href="#">112072</a>                           | <a href="#">HMDB0000194</a>                                | 121.069 | 5.57  | -9.5E-01 | -2.5E-01 |
| C_0043 | Cys                                                    | <a href="#">594</a>                              | <a href="#">HMDB0000574.HMDB0003417</a>                    | 122.028 | 9.35  | -6.3E-01 | 2.8E-01  |
| C_0044 | 2-Amino-2-(hydroxymethyl)-1,3-propanediol              | <a href="#">6503</a>                             |                                                            | 122.081 | 6.77  | 1.3E-01  | -9.0E-02 |
| C_0045 | Nicotinamide                                           | <a href="#">936</a>                              | <a href="#">HMDB0001406</a>                                | 123.055 | 6.08  | -8.5E-01 | 4.2E-01  |
| C_0046 | Nicotinic acid                                         | <a href="#">938</a>                              | <a href="#">HMDB0001488</a>                                | 124.039 | 8.27  | 1.8E-01  | -8.6E-02 |
| C_0047 | Taurine                                                | <a href="#">1123</a>                             | <a href="#">HMDB0000251</a>                                | 126.022 | 18.84 | -9.8E-01 | -8.7E-02 |
| C_0048 | 1-Methylhistamine                                      | <a href="#">3614</a>                             | <a href="#">HMDB0000898</a>                                | 126.103 | 4.01  | -5.1E-01 | 8.2E-01  |
| C_0049 | 3-Hydroxy-2-methyl-4-pyrone                            | <a href="#">8369</a>                             | <a href="#">HMDB0030776</a>                                | 127.038 | 18.92 | 1.1E-01  | -5.9E-01 |
| C_0051 | Imidazole-4-acetic acid                                | <a href="#">96215</a>                            | <a href="#">HMDB0002024</a>                                | 127.050 | 6.57  | -4.0E-01 | 8.3E-01  |
| C_0052 | XC0016                                                 |                                                  |                                                            | 129.066 | 7.17  | -7.8E-01 | -1.8E-01 |
| C_0053 | 4-Oxopyrrolidine-2-carboxylic acid                     | <a href="#">107541</a>                           |                                                            | 130.050 | 9.05  | -9.6E-01 | -8.2E-03 |
| C_0054 | Pipecolic acid                                         | <a href="#">439227</a>                           | <a href="#">HMDB0000070.HMDB0000716.HMDB0005960</a>        | 130.087 | 8.43  | -9.3E-01 | -3.4E-01 |
| C_0055 | <i>trans</i> -Glutaconic acid                          | <a href="#">5280498</a>                          | <a href="#">HMDB0000620</a>                                | 131.034 | 19.62 | -8.3E-01 | -3.2E-01 |
| C_0056 | <i>N</i> -Acetylputrescine                             | <a href="#">122356</a>                           | <a href="#">HMDB0002064</a>                                | 131.118 | 6.90  | -1.5E-01 | 4.9E-01  |
| C_0057 | Hydroxyproline                                         | <a href="#">5810</a>                             | <a href="#">HMDB0000725</a>                                | 132.066 | 9.94  | -9.8E-01 | -1.2E-01 |
| C_0058 | 3-Guanidinopropionic acid                              | <a href="#">67701</a>                            |                                                            | 132.076 | 6.56  | -8.1E-01 | -2.1E-01 |
| C_0059 | 6-Aminohexanoic acid                                   | <a href="#">564</a>                              | <a href="#">HMDB0001901</a>                                | 132.102 | 6.77  | -9.8E-01 | 1.3E-01  |
| C_0060 | Leu                                                    | <a href="#">857</a>                              | <a href="#">HMDB0000687</a>                                | 132.102 | 8.47  | -9.5E-01 | 3.0E-01  |
| C_0061 | Ile                                                    | <a href="#">791</a>                              | <a href="#">HMDB0000172</a>                                | 132.102 | 8.37  | -9.5E-01 | 2.7E-01  |
| C_0062 | Gly-Gly                                                | <a href="#">11163</a>                            | <a href="#">HMDB0011733</a>                                | 133.060 | 6.85  | -4.4E-01 | -2.9E-02 |
| C_0063 | Asn                                                    | <a href="#">236</a>                              | <a href="#">HMDB0000168.HMDB0033780</a>                    | 133.060 | 8.69  | -9.9E-01 | 4.1E-03  |
| C_0064 | Creatine                                               | <a href="#">586</a>                              | <a href="#">HMDB0000064</a>                                | 133.079 | 7.24  | -9.7E-01 | -1.6E-01 |
| C_0065 | Ornithine                                              | <a href="#">389</a>                              | <a href="#">HMDB0000214.HMDB0003374</a>                    | 133.097 | 5.57  | -4.6E-01 | 5.1E-01  |
| C_0066 | Thiaproline                                            | <a href="#">9934</a>                             |                                                            | 134.027 | 11.62 | -6.1E-01 | 1.1E-01  |
| C_0067 | Asp                                                    | <a href="#">424</a>                              | <a href="#">HMDB0000191.HMDB0006483</a>                    | 134.044 | 9.60  | -7.4E-01 | -1.9E-01 |
| C_0068 | Adenine                                                | <a href="#">190</a>                              | <a href="#">HMDB0000034</a>                                | 136.062 | 6.24  | -9.6E-01 | 2.2E-02  |
| C_0069 | Hypoxanthine                                           | <a href="#">790</a>                              | <a href="#">HMDB0000157</a>                                | 137.046 | 9.42  | -6.1E-01 | 7.6E-01  |
| C_0070 | 1-Methylnicotinamide                                   | <a href="#">457</a>                              | <a href="#">HMDB0000699</a>                                | 137.071 | 6.02  | -9.2E-01 | 1.5E-01  |
| C_0072 | Trigonelline                                           | <a href="#">5570</a>                             | <a href="#">HMDB0000875</a>                                | 138.056 | 8.62  | -8.8E-01 | 4.4E-01  |
| C_0073 | Tyramine                                               | <a href="#">5610</a>                             | <a href="#">HMDB0000306</a>                                | 138.091 | 6.80  | -6.9E-01 | -1.8E-01 |
| C_0074 | γ-Glu-Lys_divalent                                     | <a href="#">65254</a>                            | <a href="#">HMDB0029154</a>                                | 138.582 | 7.02  | -7.2E-01 | -3.3E-01 |
| C_0075 | Urocanic acid                                          | <a href="#">736715</a>                           | <a href="#">HMDB0000301</a>                                | 139.050 | 6.79  | 1.0E-01  | -7.1E-02 |
| C_0076 | 1 <i>H</i> -Imidazole-4-propionic acid                 | <a href="#">10105257</a>                         |                                                            | 141.066 | 6.64  | 1.2E-02  | -4.4E-02 |
| C_0077 | 1-Methyl-4-imidazoleacetic acid                        | <a href="#">75810</a>                            | <a href="#">HMDB0002820</a>                                | 141.066 | 6.79  | 9.6E-02  | -3.0E-02 |
| C_0078 | XC0029<br>Stachydrine                                  | <a href="#">0</a><br><a href="#">115244</a>      | <a href="#">HMDB0004827</a>                                | 144.101 | 9.44  | -8.1E-01 | -1.3E-01 |
| C_0079 | 4-Guanidinobutyric acid                                | <a href="#">500</a>                              | <a href="#">HMDB0003464</a>                                | 146.092 | 6.79  | -5.2E-01 | -8.8E-02 |
| C_0080 | γ-Butyrobetaine                                        | <a href="#">134</a>                              | <a href="#">HMDB0001161</a>                                | 146.118 | 6.63  | -9.6E-01 | -2.3E-01 |
| C_0081 | Acetylcholine                                          | <a href="#">187</a>                              | <a href="#">HMDB0000895</a>                                | 146.118 | 6.22  | -9.7E-01 | -1.9E-01 |
| C_0082 | Spermidine                                             | <a href="#">1102</a>                             | <a href="#">HMDB0001257</a>                                | 146.165 | 3.70  | -5.8E-01 | 9.0E-02  |
| C_0083 | Lys                                                    | <a href="#">866</a>                              | <a href="#">HMDB0000182.HMDB0003405</a>                    | 147.113 | 5.62  | -9.8E-01 | -1.6E-01 |
| C_0084 | 2-Methylthiazolidine-4-carboxylic acid                 | <a href="#">160736</a>                           |                                                            | 148.042 | 11.83 | -6.8E-01 | 7.0E-01  |
| C_0085 | Isoglutamic acid                                       | <a href="#">73064</a>                            |                                                            | 148.060 | 7.52  | 5.7E-01  | -5.8E-02 |
| C_0086 | <i>N</i> -Acetyls erine                                | <a href="#">65249</a>                            | <a href="#">HMDB0002931</a>                                | 148.060 | 19.78 | -6.8E-01 | 3.5E-02  |
| C_0087 | <i>threo</i> -β-Methylaspartic acid                    | <a href="#">440064</a>                           |                                                            | 148.060 | 10.22 | -7.6E-02 | 6.0E-01  |
| C_0088 | <i>N</i> -Methylaspartic acid                          | <a href="#">22880</a>                            | <a href="#">HMDB0002393</a>                                | 148.060 | 11.34 | -9.1E-01 | -3.7E-01 |
| C_0089 | Gln                                                    | <a href="#">738</a>                              | <a href="#">HMDB0000641.HMDB0003423</a>                    | 148.079 | 8.88  | -9.8E-01 | -1.4E-01 |
| C_0090 | Glu                                                    | <a href="#">611</a>                              | <a href="#">HMDB0000148.HMDB0003339</a>                    | 149.063 | 9.04  | -9.5E-01 | -1.0E-01 |
| C_0091 | Met                                                    | <a href="#">876</a>                              | <a href="#">HMDB0000696</a>                                | 150.058 | 8.84  | -9.6E-01 | 7.3E-02  |
| C_0092 | Triethanolamine                                        | <a href="#">7618</a>                             |                                                            | 150.112 | 6.74  | 2.5E-01  | -3.5E-01 |
| C_0093 | Guanine                                                | <a href="#">764</a>                              | <a href="#">HMDB0000132</a>                                | 152.057 | 6.83  | -4.4E-01 | -2.8E-01 |
| C_0094 | γ-Glu-Arg_divalent                                     | <a href="#">20719180</a>                         | <a href="#">HMDB0029143</a>                                | 152.585 | 7.13  | -6.5E-01 | -3.2E-01 |
| C_0095 | Xanthine                                               | <a href="#">1188</a>                             | <a href="#">HMDB0000292</a>                                | 153.041 | 16.64 | -5.9E-01 | 7.7E-01  |
| C_0096 | <i>N</i> <sup>1</sup> -Methyl-4-pyridone-5-carboxamide | <a href="#">440810</a>                           | <a href="#">HMDB0004194</a>                                | 153.066 | 15.59 | -9.3E-01 | 8.4E-02  |
| C_0097 | Octopamine<br>Dopamine                                 | <a href="#">440266</a><br><a href="#">681</a>    | <a href="#">HMDB0004825</a><br><a href="#">HMDB0000073</a> | 154.087 | 7.11  | -9.5E-01 | 2.6E-01  |
| C_0098 | His                                                    | <a href="#">773</a>                              | <a href="#">HMDB0000177</a>                                | 156.077 | 5.98  | -9.9E-01 | -3.0E-02 |
| C_0099 | Imidazolelactic acid                                   | <a href="#">793</a>                              |                                                            | 157.061 | 7.22  | -3.8E-01 | 4.9E-01  |
| C_0100 | XC0145<br>Ala-Ala                                      | <a href="#">15331</a><br><a href="#">5460362</a> | <a href="#">HMDB0003459</a>                                | 161.091 | 7.57  | -1.2E-01 | -4.0E-01 |
| C_0101 | <i>N</i> <sup>6</sup> -Methyllysine                    | <a href="#">164795</a>                           | <a href="#">HMDB0002038</a>                                | 161.128 | 5.80  | -9.4E-01 | -2.4E-01 |
| C_0102 | <i>O</i> -Acetylhomoserine<br>2-Aminoadipic acid       | <a href="#">439389</a><br><a href="#">92136</a>  | <a href="#">HMDB0000510</a>                                | 162.076 | 9.04  | -6.4E-01 | -3.3E-01 |
| C_0103 | 5-Hydroxylysine                                        | <a href="#">3032849</a>                          | <a href="#">HMDB0000450</a>                                | 163.107 | 5.84  | -5.9E-01 | -7.6E-01 |
| C_0104 | Carnitine                                              | <a href="#">85</a>                               | <a href="#">HMDB0000062</a>                                | 163.116 | 6.95  | -9.6E-01 | -2.2E-01 |
| C_0105 | Lumazine                                               | <a href="#">10250</a>                            |                                                            | 165.041 | 18.77 | 2.1E-01  | 4.4E-01  |
| C_0106 | Methionine sulfoxide                                   | <a href="#">158980</a>                           | <a href="#">HMDB0002005</a>                                | 166.053 | 9.84  | -3.6E-01 | -8.5E-01 |
| C_0107 | 7-Methylguanine                                        | <a href="#">11361</a>                            | <a href="#">HMDB0000897</a>                                | 166.072 | 6.75  | -8.7E-01 | 3.4E-01  |
| C_0108 | Normetanephrine_-H <sub>2</sub> O                      | <a href="#">688100</a>                           | <a href="#">HMDB0000819</a>                                | 166.086 | 7.48  | -4.7E-01 | 7.6E-01  |
| C_0109 | Phe                                                    | <a href="#">994</a>                              | <a href="#">HMDB0000159</a>                                | 166.086 | 9.12  | -9.3E-01 | 3.5E-01  |
| C_0110 | Taurocyamine                                           | <a href="#">68340</a>                            | <a href="#">HMDB0003584</a>                                | 168.042 | 18.85 | 6.9E-01  | -3.1E-01 |

|        |                                                                     |                                                                           |                                                                                           |         |       |          |          |
|--------|---------------------------------------------------------------------|---------------------------------------------------------------------------|-------------------------------------------------------------------------------------------|---------|-------|----------|----------|
| C_0111 | Pyridoxal                                                           | <a href="#">1050</a>                                                      | <a href="#">HMDB0001545</a>                                                               | 168.065 | 7.18  | -2.0E-01 | -1.4E-01 |
| C_0112 | 4-Hydroxyphenylglycine<br>3-Methoxyanthranilic acid                 | <a href="#">92143</a><br><a href="#">255720</a>                           |                                                                                           | 168.065 | 9.97  | 1.5E-01  | 6.7E-02  |
| C_0113 | Tyr-Arg_divalent                                                    | <a href="#">123804</a>                                                    |                                                                                           | 169.594 | 6.29  | 1.1E-01  | -4.6E-01 |
| C_0114 | Noradrenaline<br>6-Hydroxydopamine                                  | <a href="#">439260</a><br><a href="#">4624</a>                            | <a href="#">HMDB0000216</a><br><a href="#">HMDB0001537</a>                                | 170.082 | 7.38  | -9.3E-01 | 3.3E-01  |
| C_0115 | 1-Methylhistidine<br>3-Methylhistidine                              | <a href="#">92105</a><br><a href="#">64969</a>                            | <a href="#">HMDB0000001</a><br><a href="#">HMDB0000479</a>                                | 170.092 | 6.13  | -7.4E-01 | -5.4E-01 |
| C_0116 | XC0040                                                              |                                                                           |                                                                                           | 174.087 | 9.93  | -8.9E-01 | 4.0E-01  |
| C_0117 | N-Acetylornithine                                                   | <a href="#">439232</a>                                                    | <a href="#">HMDB0003357</a>                                                               | 175.108 | 7.80  | 9.0E-02  | -3.5E-01 |
| C_0118 | N <sup>5</sup> -Ethylglutamine                                      | <a href="#">439378</a>                                                    |                                                                                           | 175.109 | 9.07  | -9.0E-01 | -1.0E-01 |
| C_0119 | Arg                                                                 | <a href="#">6322</a>                                                      | <a href="#">HMDB0000517</a> , <a href="#">HMDB0003416</a>                                 | 175.119 | 5.82  | -9.5E-01 | 6.4E-02  |
| C_0120 | Guanidinosuccinic acid                                              | <a href="#">439918</a>                                                    | <a href="#">HMDB0003157</a>                                                               | 176.067 | 8.32  | -8.3E-01 | 2.3E-02  |
| C_0121 | Citrulline                                                          | <a href="#">9750</a>                                                      | <a href="#">HMDB0000904</a>                                                               | 176.103 | 9.12  | -9.1E-01 | -2.7E-01 |
| C_0122 | Serotonin                                                           | <a href="#">5202</a>                                                      | <a href="#">HMDB0000259</a>                                                               | 177.103 | 7.17  | -7.5E-01 | -3.3E-01 |
| C_0123 | Alliin                                                              | <a href="#">87310</a>                                                     |                                                                                           | 178.053 | 12.55 | 1.7E-01  | -1.7E-01 |
| C_0124 | Gluconolactone                                                      | <a href="#">7027</a>                                                      | <a href="#">HMDB0000150</a>                                                               | 179.055 | 19.61 | -9.0E-01 | -4.8E-02 |
| C_0125 | Glucosamine                                                         | <a href="#">439213</a>                                                    | <a href="#">HMDB0001514</a>                                                               | 180.089 | 7.58  | -6.3E-01 | -3.5E-01 |
| C_0126 | Tyr                                                                 | <a href="#">1153</a>                                                      | <a href="#">HMDB0000158</a>                                                               | 182.081 | 9.36  | -9.7E-01 | 1.4E-01  |
| C_0127 | Phosphorylcholine                                                   | <a href="#">1014</a>                                                      | <a href="#">HMDB0001565</a>                                                               | 184.074 | 17.28 | -9.7E-01 | 2.2E-01  |
| C_0128 | Adrenaline                                                          | <a href="#">5816</a>                                                      | <a href="#">HMDB0000068</a>                                                               | 184.097 | 7.49  | -2.8E-01 | 9.1E-01  |
| C_0129 | N <sup>1</sup> -Acetylspermidine                                    | <a href="#">496</a>                                                       | <a href="#">HMDB0001276</a>                                                               | 188.176 | 5.15  | -9.8E-01 | -2.0E-02 |
| C_0130 | N-Acetyllysine                                                      | <a href="#">92907</a>                                                     | <a href="#">HMDB0000446</a>                                                               | 189.123 | 8.01  | -4.9E-01 | -2.4E-01 |
| C_0131 | Gly-Leu                                                             |                                                                           |                                                                                           | 189.123 | 7.90  | 1.2E-01  | -2.6E-01 |
| C_0132 | N <sup>6</sup> -Acetyllysine                                        | <a href="#">92832</a>                                                     | <a href="#">HMDB0000206</a>                                                               | 189.123 | 9.42  | -5.8E-01 | -1.2E-01 |
| C_0133 | N <sub>ω</sub> -Methylarginine                                      | <a href="#">132862</a>                                                    |                                                                                           | 189.134 | 6.09  | -8.9E-01 | 4.1E-01  |
| C_0134 | N <sup>6</sup> ,N <sup>6</sup> ,N <sup>6</sup> -Trimethyllysine     | <a href="#">440120</a>                                                    | <a href="#">HMDB0001325</a>                                                               | 189.160 | 5.86  | -8.9E-01 | -2.5E-01 |
| C_0135 | Homocitrulline                                                      | <a href="#">65072</a>                                                     | <a href="#">HMDB0000679</a>                                                               | 190.118 | 9.20  | -8.1E-01 | -2.8E-01 |
| C_0136 | Gly-Asp                                                             | <a href="#">97363</a>                                                     |                                                                                           | 191.067 | 8.12  | -9.9E-01 | -3.1E-02 |
| C_0137 | 4-Aminohippuric acid                                                | <a href="#">2148</a>                                                      | <a href="#">HMDB0001867</a>                                                               | 195.078 | 8.38  | -2.8E-01 | 9.1E-01  |
| C_0138 | Tyrosine methyl ester                                               | <a href="#">70652</a>                                                     |                                                                                           | 196.097 | 7.50  | 1.7E-01  | -1.1E-01 |
| C_0139 | N-Acetylhistidine                                                   | <a href="#">75619</a>                                                     |                                                                                           | 198.087 | 8.04  | -6.2E-01 | -2.9E-02 |
| C_0140 | ADMA                                                                | <a href="#">123831</a>                                                    | <a href="#">HMDB0001539</a>                                                               | 203.150 | 6.26  | -9.5E-01 | 1.3E-01  |
| C_0141 | SDMA                                                                | <a href="#">169148</a>                                                    | <a href="#">HMDB0003334</a>                                                               | 203.150 | 6.36  | -9.1E-01 | -3.6E-02 |
| C_0142 | Spermine                                                            | <a href="#">1103</a>                                                      | <a href="#">HMDB0001256</a>                                                               | 203.223 | 3.65  | -2.4E-01 | 8.1E-02  |
| C_0143 | O-Acetylcarnitine                                                   | <a href="#">439756</a>                                                    | <a href="#">HMDB0000201</a>                                                               | 204.122 | 7.40  | -9.9E-01 | -8.2E-02 |
| C_0144 | γ-Glu-Gly                                                           | <a href="#">165527</a>                                                    | <a href="#">HMDB0011667</a>                                                               | 205.082 | 9.96  | -7.8E-01 | 5.8E-01  |
| C_0145 | Trp                                                                 | <a href="#">1148</a>                                                      | <a href="#">HMDB0000929</a>                                                               | 205.097 | 9.07  | -8.6E-01 | -9.0E-02 |
| C_0146 | Carboxymethyllysine                                                 | <a href="#">123800</a>                                                    |                                                                                           | 205.119 | 7.58  | -9.7E-01 | -1.0E-01 |
| C_0147 | Lipoamide                                                           | <a href="#">863</a>                                                       | <a href="#">HMDB0000962</a>                                                               | 206.069 | 19.18 | -2.8E-01 | 9.1E-01  |
| C_0148 | Kynurenine                                                          | <a href="#">846</a>                                                       | <a href="#">HMDB0000684</a>                                                               | 209.092 | 8.27  | -9.6E-01 | -2.4E-01 |
| C_0149 | Propionylcarnitine<br>XC0061                                        | <a href="#">188824</a><br><a href="#">0</a>                               | <a href="#">HMDB0000824</a>                                                               | 218.138 | 7.63  | -8.3E-01 | -8.1E-02 |
| C_0150 | β-Ala-Lys                                                           | <a href="#">440638</a>                                                    |                                                                                           | 218.150 | 5.53  | -1.8E-01 | -3.6E-01 |
| C_0151 | γ-Glu-Ala                                                           | <a href="#">440103</a>                                                    | <a href="#">HMDB0006248</a>                                                               | 219.098 | 10.18 | -7.4E-01 | 2.5E-01  |
| C_0152 | XC0065                                                              |                                                                           |                                                                                           | 221.091 | 10.84 | -9.7E-01 | -1.8E-01 |
| C_0153 | N-Acetylglucosylamine                                               | <a href="#">439454</a>                                                    | <a href="#">HMDB0001104</a>                                                               | 221.112 | 8.12  | -5.4E-01 | 2.7E-01  |
| C_0154 | N-Acetylgalactosamine<br>N-Acetylglucosamine<br>N-Acetylmannosamine | <a href="#">35717</a><br><a href="#">439174</a><br><a href="#">439281</a> | <a href="#">HMDB0000853</a><br><a href="#">HMDB0000215</a><br><a href="#">HMDB0001129</a> | 222.097 | 18.87 | -6.4E-01 | -1.5E-01 |
| C_0155 | Cystathionine                                                       | <a href="#">834</a>                                                       | <a href="#">HMDB0000099</a>                                                               | 223.075 | 8.16  | -9.5E-01 | -2.7E-01 |
| C_0156 | Neostigmine                                                         | <a href="#">4456</a>                                                      |                                                                                           | 223.145 | 7.29  | 7.5E-02  | -2.5E-01 |
| C_0157 | 3-Hydroxykynurenine                                                 | <a href="#">11811</a>                                                     | <a href="#">HMDB0011631</a>                                                               | 225.085 | 8.16  | -9.1E-01 | -3.7E-01 |
| C_0158 | Carnosine                                                           | <a href="#">439224</a>                                                    | <a href="#">HMDB0000033</a>                                                               | 227.114 | 5.51  | -9.4E-01 | -2.9E-01 |
| C_0159 | 2'-Deoxycytidine                                                    | <a href="#">13711</a>                                                     | <a href="#">HMDB0000014</a>                                                               | 228.098 | 7.73  | -4.5E-01 | -1.9E-01 |
| C_0160 | Butyrylcarnitine                                                    | <a href="#">439829</a>                                                    | <a href="#">HMDB0002013</a>                                                               | 232.154 | 7.83  | -9.0E-01 | -3.0E-01 |
| C_0161 | Isobutyrylcarnitine                                                 | <a href="#">168379</a>                                                    | <a href="#">HMDB0000736</a>                                                               | 232.154 | 7.77  | -4.0E-01 | -1.6E-01 |
| C_0162 | γ-Glu-Ser                                                           | <a href="#">22844748</a>                                                  | <a href="#">HMDB0029158</a>                                                               | 235.093 | 10.42 | -9.2E-01 | 2.5E-01  |
| C_0163 | Thr-Asp                                                             | <a href="#">3280446</a>                                                   |                                                                                           | 235.093 | 8.73  | -9.2E-01 | -3.9E-02 |
| C_0164 | Ser-Glu                                                             |                                                                           |                                                                                           | 235.093 | 8.54  | -9.8E-01 | -1.0E-01 |
| C_0165 | N'-Formylkynurenine                                                 | <a href="#">910</a>                                                       | <a href="#">HMDB0001200</a>                                                               | 237.087 | 10.05 | -9.1E-01 | -3.7E-01 |
| C_0166 | Cystine                                                             | <a href="#">595</a>                                                       | <a href="#">HMDB0000192</a>                                                               | 241.032 | 9.09  | 4.2E-01  | -2.8E-01 |
| C_0167 | Homocarnosine                                                       | <a href="#">10243361</a>                                                  | <a href="#">HMDB0000745</a>                                                               | 241.130 | 5.57  | -9.6E-01 | -2.2E-01 |
| C_0168 | Thymidine                                                           | <a href="#">5789</a>                                                      | <a href="#">HMDB0000273</a>                                                               | 243.098 | 18.85 | -2.1E-01 | -2.6E-01 |
| C_0169 | Cytidine                                                            | <a href="#">6175</a>                                                      | <a href="#">HMDB0000089</a>                                                               | 244.093 | 7.93  | -8.3E-01 | 5.3E-01  |
| C_0170 | Uridine                                                             | <a href="#">6029</a>                                                      | <a href="#">HMDB0000296</a>                                                               | 245.077 | 18.89 | -7.8E-01 | 5.8E-01  |
| C_0171 | N <sup>1</sup> -Acetylspermine                                      | <a href="#">916</a>                                                       | <a href="#">HMDB0001186</a>                                                               | 245.233 | 4.51  | -9.1E-01 | -3.7E-01 |
| C_0172 | Isovaleryl carnitine                                                | <a href="#">6426851</a>                                                   | <a href="#">HMDB0000688</a>                                                               | 246.170 | 8.00  | -7.0E-01 | 9.0E-02  |
| C_0173 | γ-Glu-Val                                                           | <a href="#">7015683</a>                                                   | <a href="#">HMDB0011172</a>                                                               | 247.129 | 10.51 | -9.7E-01 | -7.9E-02 |
| C_0174 | Malonylcarnitine                                                    | <a href="#">22833583</a>                                                  | <a href="#">HMDB0002095</a>                                                               | 248.112 | 8.37  | -9.2E-01 | -1.8E-01 |
| C_0175 | Pyridoxamine 5'-phosphate                                           | <a href="#">1053</a>                                                      | <a href="#">HMDB0001555</a>                                                               | 249.063 | 8.61  | -9.5E-01 | 4.8E-02  |

|        |                                     |                           |                             |         |       |          |          |
|--------|-------------------------------------|---------------------------|-----------------------------|---------|-------|----------|----------|
| C_0176 | γ-Glu-Thr                           | <a href="#">53861142</a>  | <a href="#">HMDB0029159</a> | 249.108 | 10.52 | -9.5E-01 | -2.3E-01 |
| C_0177 | γ-Glu-Cys                           | <a href="#">123938</a>    | <a href="#">HMDB0001049</a> | 251.069 | 10.60 | -7.9E-01 | 1.5E-01  |
| C_0178 | 2'-Deoxyinosine                     | <a href="#">135398593</a> | <a href="#">HMDB0000071</a> | 253.094 | 15.41 | 1.8E-01  | -8.6E-02 |
| C_0179 | XC0089                              |                           |                             | 255.098 | 7.80  | -9.9E-01 | -3.3E-02 |
| C_0180 | XC0154                              | <a href="#">3182</a>      |                             | 255.107 | 18.93 | 5.1E-01  | -4.8E-01 |
| C_0181 | Glycerophosphocholine               | <a href="#">439285</a>    | <a href="#">HMDB0000086</a> | 258.108 | 18.43 | -9.9E-01 | -3.0E-02 |
| C_0182 | γ-Glu-Ile                           | <a href="#">22885096</a>  | <a href="#">HMDB0011170</a> | 261.143 | 10.68 | -9.6E-01 | 2.5E-03  |
|        | γ-Glu-Leu                           | <a href="#">151023</a>    | <a href="#">HMDB0011171</a> |         |       |          |          |
| C_0183 | γ-Glu-Asn                           | <a href="#">131801686</a> | <a href="#">HMDB0029144</a> | 262.103 | 10.56 | -8.9E-01 | 4.1E-01  |
| C_0184 | γ-Glu-Ornithine                     | <a href="#">189156</a>    | <a href="#">HMDB0002248</a> | 262.140 | 6.95  | -4.7E-01 | -3.4E-02 |
| C_0185 | γ-Glu-Asp                           | <a href="#">161197</a>    | <a href="#">HMDB0030419</a> | 263.088 | 10.76 | -9.1E-01 | -6.9E-02 |
| C_0186 | Thiamine                            | <a href="#">1130</a>      | <a href="#">HMDB0000235</a> | 265.111 | 5.35  | -9.5E-01 | 2.7E-01  |
| C_0187 | Adenosine                           | <a href="#">60961</a>     | <a href="#">HMDB0000050</a> | 268.103 | 8.11  | -9.3E-01 | -3.3E-01 |
| C_0188 | Inosine                             | <a href="#">6021</a>      | <a href="#">HMDB0000195</a> | 269.088 | 16.60 | -8.7E-01 | 4.4E-01  |
| C_0189 | γ-Glu-Gln                           | <a href="#">150914</a>    | <a href="#">HMDB0011738</a> | 276.119 | 10.77 | -9.7E-01 | 1.2E-01  |
| C_0190 | Glu-Glu                             | <a href="#">439500</a>    |                             | 277.104 | 8.96  | -6.6E-01 | -4.7E-02 |
| C_0191 | γ-Glu-Glu                           | <a href="#">92865</a>     | <a href="#">HMDB0011737</a> | 277.103 | 10.86 | -6.9E-01 | 6.1E-01  |
| C_0192 | Saccharopine                        | <a href="#">160556</a>    | <a href="#">HMDB0000279</a> | 277.139 | 8.84  | -9.4E-01 | -2.9E-01 |
| C_0193 | γ-Glu-Met                           | <a href="#">7009567</a>   | <a href="#">HMDB0034367</a> | 279.101 | 10.73 | -9.1E-01 | -3.7E-01 |
| C_0194 | 1-Methyladenosine                   | <a href="#">27476</a>     | <a href="#">HMDB0003331</a> | 282.117 | 8.17  | -9.7E-01 | 1.7E-01  |
| C_0195 | Guanosine                           | <a href="#">6802</a>      | <a href="#">HMDB0000133</a> | 284.099 | 10.51 | -9.6E-01 | 2.2E-01  |
| C_0196 | γ-Glu-His                           | <a href="#">7017195</a>   | <a href="#">HMDB0029151</a> | 285.120 | 7.13  | -9.8E-01 | 1.2E-01  |
| C_0197 | Octanoylcarnitine                   | <a href="#">11953814</a>  | <a href="#">HMDB0000791</a> | 288.217 | 8.52  | -9.5E-01 | -1.6E-01 |
| C_0198 | Ophthalmic acid                     | <a href="#">7018721</a>   | <a href="#">HMDB0005765</a> | 290.134 | 10.95 | -1.5E-01 | -1.6E-01 |
| C_0199 | Argininosuccinic acid               | <a href="#">16950</a>     | <a href="#">HMDB0000052</a> | 291.130 | 7.75  | -7.8E-01 | 3.7E-01  |
| C_0200 | γ-Glu-Phe                           | <a href="#">111299</a>    | <a href="#">HMDB0000594</a> | 295.130 | 10.78 | -8.4E-01 | -7.7E-02 |
| C_0201 | 5'-Deoxy-5'-methylthioadenosine     | <a href="#">439176</a>    | <a href="#">HMDB0001173</a> | 298.097 | 8.28  | -9.4E-01 | -3.1E-01 |
| C_0202 | N <sup>1</sup> -Methylguanosine     | <a href="#">96373</a>     | <a href="#">HMDB0001563</a> | 298.115 | 9.97  | -9.4E-01 | 2.7E-01  |
| C_0203 | Arg-Glu                             |                           |                             | 304.161 | 6.12  | -3.1E-01 | 1.1E-01  |
| C_0204 | Glutathione (GSSG)_divalent         | <a href="#">65359</a>     | <a href="#">HMDB0003337</a> | 307.084 | 10.07 | -9.9E-01 | -1.1E-01 |
| C_0205 | Glutathione (GSH)                   | <a href="#">124886</a>    | <a href="#">HMDB0000125</a> | 308.092 | 10.97 | -6.9E-01 | 2.6E-01  |
| C_0206 | XC0126                              |                           |                             | 310.116 | 12.48 | -6.6E-01 | -4.7E-01 |
| C_0207 | Tyr-Glu                             |                           |                             | 311.122 | 9.16  | -3.2E-01 | 2.4E-01  |
| C_0208 | γ-Glu-Tyr                           | <a href="#">94340</a>     | <a href="#">HMDB0011741</a> | 311.123 | 10.95 | -7.5E-02 | 5.2E-01  |
| C_0209 | S-Methylglutathione                 | <a href="#">115260</a>    |                             | 322.107 | 11.08 | -9.8E-01 | 9.4E-02  |
| C_0210 | XC0132                              |                           |                             | 325.161 | 7.10  | -9.6E-01 | -1.6E-01 |
| C_0211 | NMN                                 | <a href="#">14180</a>     | <a href="#">HMDB0000229</a> | 335.065 | 17.41 | -8.9E-01 | -3.9E-01 |
| C_0212 | Lauroylcarnitine                    | <a href="#">168381</a>    | <a href="#">HMDB0002250</a> | 344.280 | 9.14  | -9.2E-01 | -2.3E-01 |
| C_0213 | Thiamine phosphate                  | <a href="#">1131</a>      | <a href="#">HMDB0002666</a> | 345.078 | 8.78  | -9.8E-01 | 1.5E-02  |
| C_0214 | XC0137                              |                           |                             | 350.099 | 11.19 | -9.4E-01 | -1.5E-01 |
| C_0215 | Decarboxylated S-Adenosylmethionine | <a href="#">439415</a>    | <a href="#">HMDB0000988</a> | 355.157 | 4.58  | 1.7E-01  | -1.7E-01 |
| C_0216 | Riboflavin                          | <a href="#">493570</a>    | <a href="#">HMDB0000244</a> | 377.147 | 18.76 | -9.2E-01 | 2.6E-01  |
| C_0217 | S-Lactoylglutathione                | <a href="#">440018</a>    | <a href="#">HMDB0001066</a> | 380.114 | 11.45 | -9.1E-01 | -3.7E-01 |
| C_0218 | S-Adenosylhomocysteine              | <a href="#">439155</a>    | <a href="#">HMDB0000939</a> | 385.129 | 7.17  | -7.0E-01 | 7.0E-01  |
| C_0219 | S-Adenosylmethionine                | <a href="#">34755</a>     | <a href="#">HMDB0001185</a> | 399.144 | 5.83  | -9.7E-01 | -2.0E-01 |
| C_0220 | Cysteine glutathione disulfide      | <a href="#">10455148</a>  | <a href="#">HMDB0000656</a> | 427.098 | 9.63  | -3.9E-01 | 2.3E-01  |

MT, migration time; PC, principal component; RT, retention time
